**Fig. S1. Otx2 expression in developing dorsal mesencephalon. (A-O')** Immunohistochemistry experiments in E11, E13.5 and P5 wild type embryos and mice with Otx2 and Zic1 (A,A',L,L'), Pax7 (B,B',M,M'), Dbx1 (C,C'), Mash1 (D,D'), Helt (E,E'), Ngn1 (F,F'), Gata2 (G,G'), Lhx1 (H,H',N,N'), Pou4f1 (I,I',O,O'), Gad65 (J,J') and vGlut2 (K,K') show that Otx2 is expressed virtually in all progenitors while in post-mitotic neurons is prevalently restricted to the Gata2<sup>+</sup>, Lhx1<sup>+</sup> and Gata65<sup>+</sup> GABAergic lineage. Note also that Zic1 expression defines two m1 sub-domains: the m1a and m1b. Abbreviations: m1, mesencephalic domain 1; m1a and m1b, mesencephalic sub-domain 1a and 1b.

**Fig. S2. Expression in developing cerebellum of m1 mesencephalic and cerebellar markers.**

(A-R) Immunohistochemistry experiments performed at E12.5 and E13.5 on wild type cerebella with Otx2 (A,B), Pax6 and Pax7 (C,D), Lhx1 and Zic1 (E,F) Mash1 and Ngn1 (G,H), Lhx1 and Pax2 (I,J), Mash1 and Helt (K,L), Lhx1 and Gata2 (M,N) Pou4f1 and Pax7 (O,P) and Dbx1 and Pax7 (Q,R) show that Otx2 expression is restricted at these stages to the developing choroid plexus and in a portion of the adjacent rhombic lip (A,B), Pax6 is expressed in the rhombic lip, developing EGL and in the VZ/SVZ close to the rhombic lip (C,D), Pax7 is restricted to the VZ/SVZ and gradually down-regulated during development (C,D,O-R), Pax2 and Lhx1 are expressed respectively in post-mitotic precursors for GABAergic interneurons and Purkinje cells (I,J) and Helt, Gata2, Pou4f1 and Dbx1 are not expressed (K-R). Abbreviations: EGL, external granule cell layer; RL, rhombic lip; VZ/SVZ, ventricular/subventricular zone; chp, choroid plexus.

**Fig. S3. Analysis of cerebellar markers in the mesencephalon of E18.5 Otx2 mutants. (A-L)**

Immunohistochemistry experiments performed at E18.5 on the mesencephalon and cerebellum of *Dbx1<sup>ICre/+</sup>* and on the mesencephalon of *Dbx1<sup>ICre/+</sup>; Otx2<sup>flox/flox</sup>* embryos with Math1 and Pax6 (A-

C), Pax6 and Zic1 (D-F), Lhx1 and Pax2 (G-I) and Lhx1 and Calb (J-L) show a very similar expression pattern between the mutant m1a sub-domain and the control cerebellum. Abbreviations as in previous Figures.

**Fig. S4. Cerebellar-like morphology in Otx2 mutants at P20.** (A-H) External view (A,B) and sagittal sections (C-H) of *Dbx1<sup>ICre/+</sup>* and *Dbx1<sup>ICre/+</sup>; Otx2<sup>lox/lox</sup>* brains at P20 are immunostained with Pax6 to assess the anterior-posterior extent of the cerebellar-like phenotype in Otx2 mutants (C-H); note that the posteriormost dorsal mesencephalon of Otx2 mutant brains does not exhibit Pax6 expression nor cerebellar-like morphology (arrow in E,H). Abbreviations as in previous Figures plus SuC, superior colliculus; InC, inferior colliculus; cu, culmen.

**Fig. S5. Lhx1 and Pax2 are expressed in post-mitotic precursors exiting the cell-cycle prevalently between E11.5 and E12.5.** (A-D) BrdU pulse experiments performed on the mesencephalon of *Dbx1<sup>ICre/+</sup>* and *Dbx1<sup>ICre/+</sup>; Otx2<sup>lox/lox</sup>* embryos administered at E12.5 with BrdU for 20 min before to be sacrificed and immunostained with Lhx1 and BrdU (A,B) and Pax2 and BrdU (C,D) show that Lhx1 and Pax2 are expressed in BrdU<sup>-</sup> post-mitotic precursors. (E-J) Immunohistochemistry experiments with Lhx1 and BrdU (E-G) and Pax2 and BrdU (H-J) are performed at E15.5 on the mesencephalon and cerebellum of *Dbx1<sup>ICre/+</sup>* and the mesencephalon of *Dbx1<sup>ICre/+</sup>; Otx2<sup>lox/lox</sup>* embryos injected with BrdU at E11.7, E11.85 and E12. These experiments confirm that the majority of Lhx1 and Pax2 progenitors exit the cell-cycle between E11.5 and E12.5. Abbreviations as in previous Figures.

**Fig. S6. Schematic representation summarizing the Otx2 requirement in the m1a and m1b sub-domains.** (A) Otx2 is cell-autonomously required in the VZ/SVZ of the m1a (Pax7<sup>+</sup>-Zic1<sup>+</sup>) sub-domain to suppress cerebellar-like neurogenesis of granule cells and cerebellar GABAergic

neurons and instruct m1a neurogenesis; our data also suggest that suppression of granule cells fate requires *Otx2* until approximately E11.5 while suppression of cerebellar-like GABAergic differentiation requires *Otx2* until E14.5. The rectangular boxes correspond to the VZ/SVZ (yellow), the early post-mitotic mantle layer (orange) and the late post-mitotic mantle layer (red); for granule cells neurogenesis the RL (yellow), the EGL (orange) and the IGL (red) are indicated. Based on previous studies (Nakatani et al., 2007; Kala et al., 2009; Agoston and Schulte, 2009; Guimera et al., 2006; Liu and Joyner, 2001a; Hatten et al., 1997; Zhao et al., 2007; Morales and Hatten, 2006; Maricich and Herrup, 1999), we have indicated the presumptive genetic cascade of transcription factors operating along the entire m1 domain and in the cerebellum for granule cells and GABAergic neurogenesis. **B)** In the m1b (*Pax7<sup>+</sup>-Zic1<sup>-</sup>*) sub-domain *Otx2* is not required to prevent cerebellar-like fate but it controls selectively the neurogenesis of GABAergic neurons by promoting the transition of *Helt<sup>+</sup>* progenitors into *Gata2<sup>+</sup>* early post-mitotic neurons. Our data do not reveal major *Otx2*-dependent abnormalities in the differentiation of glutamatergic neurons. Abbreviations: VZ/SVZ, ventricular zone/sub-ventricular zone; ML, mantle layer; RL, rhombic lip; EGL, external granule cell layer; IGL, internal granule cell layer.

**Fig. S7. Expression analysis of the *Otx2* interacting factors *Grg4* and *Meis2*.**

Immunohistochemistry assays performed in *Dbx1<sup>ICre/+</sup>* and *Dbx1<sup>ICre/+</sup>; Otx2<sup>lox/lox</sup>* embryos at E11.5, E12.5 and E13.5 with *Grg4* and *Meis2* show that lack of *Otx2* does not remarkably affect the expression of both *Meis2* and *Grg4*. Abbreviations as in previous Figures.

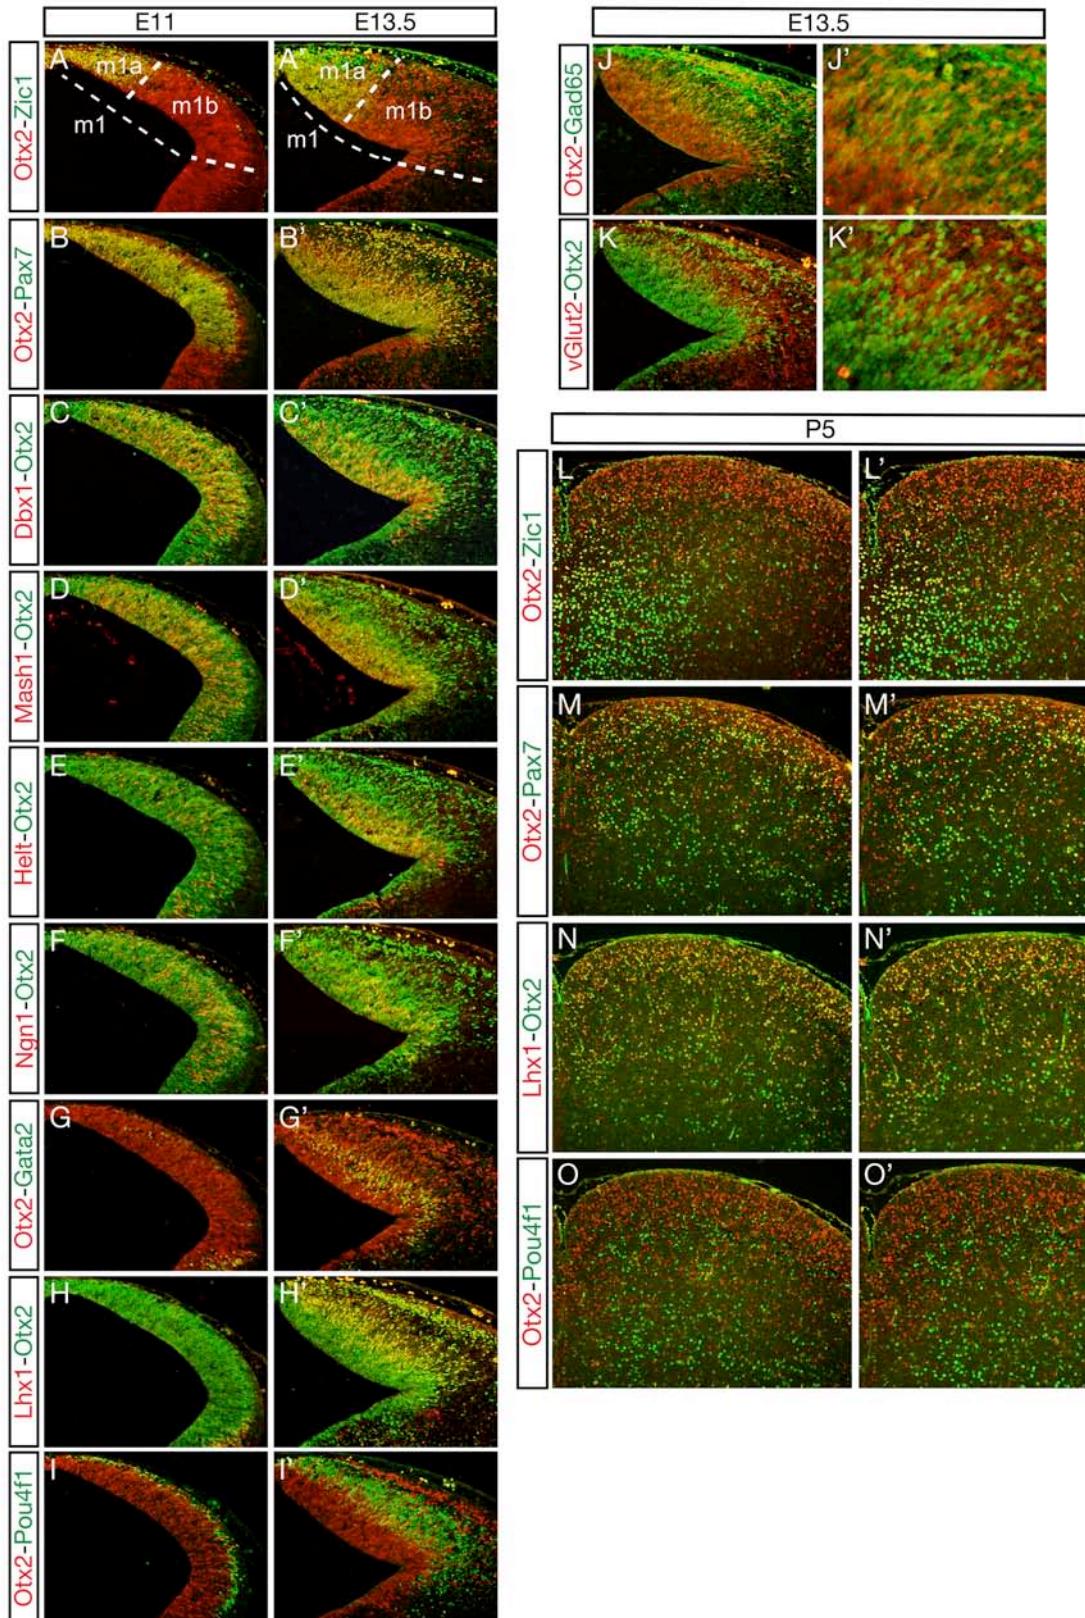

Fig. S1



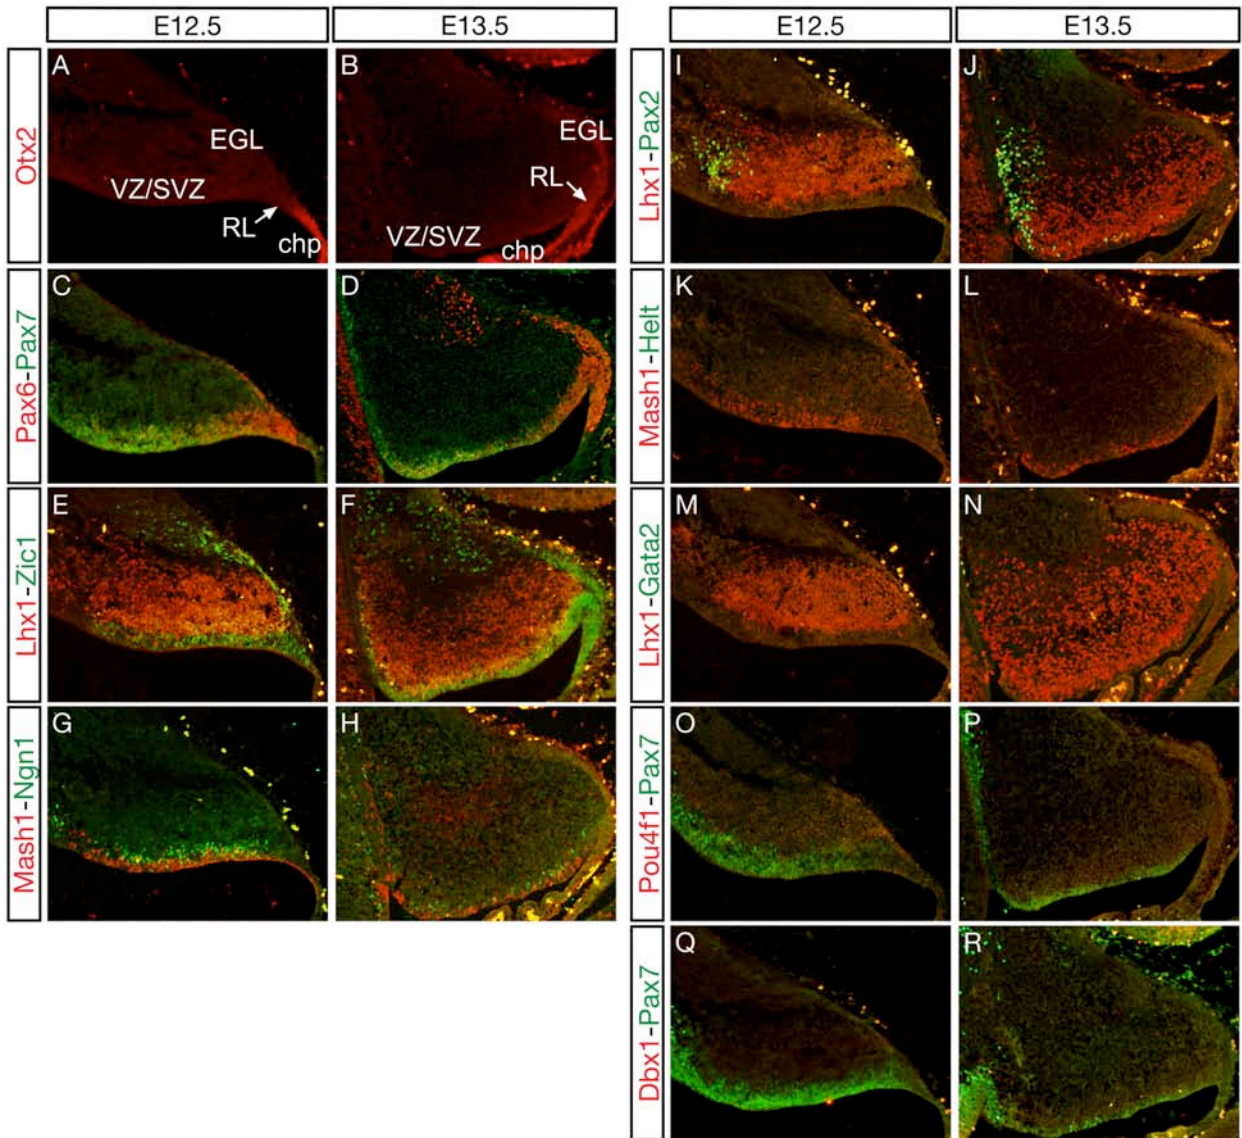

Fig. S2

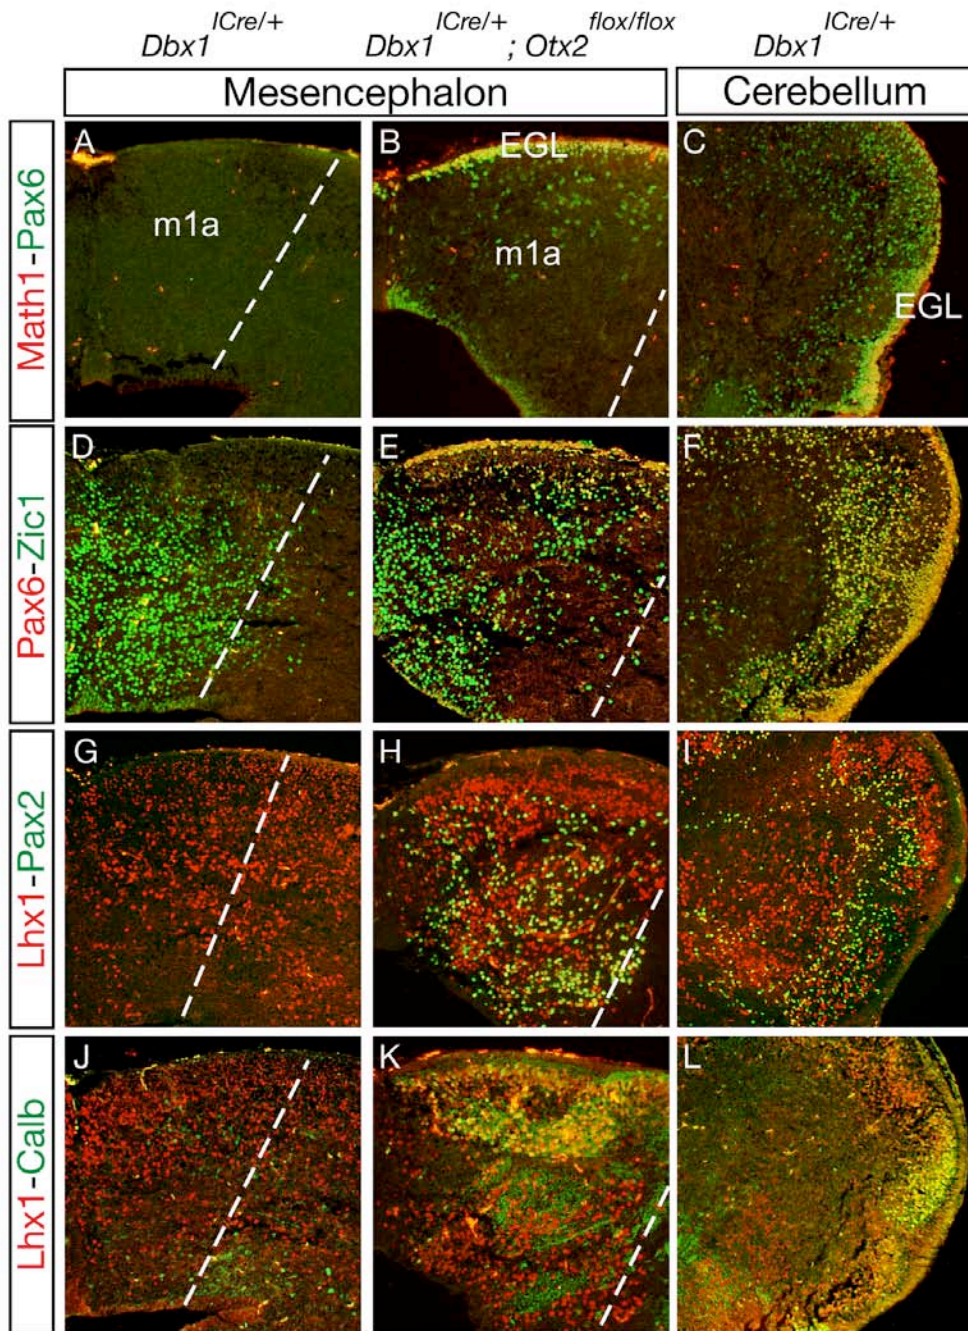

Fig. S3



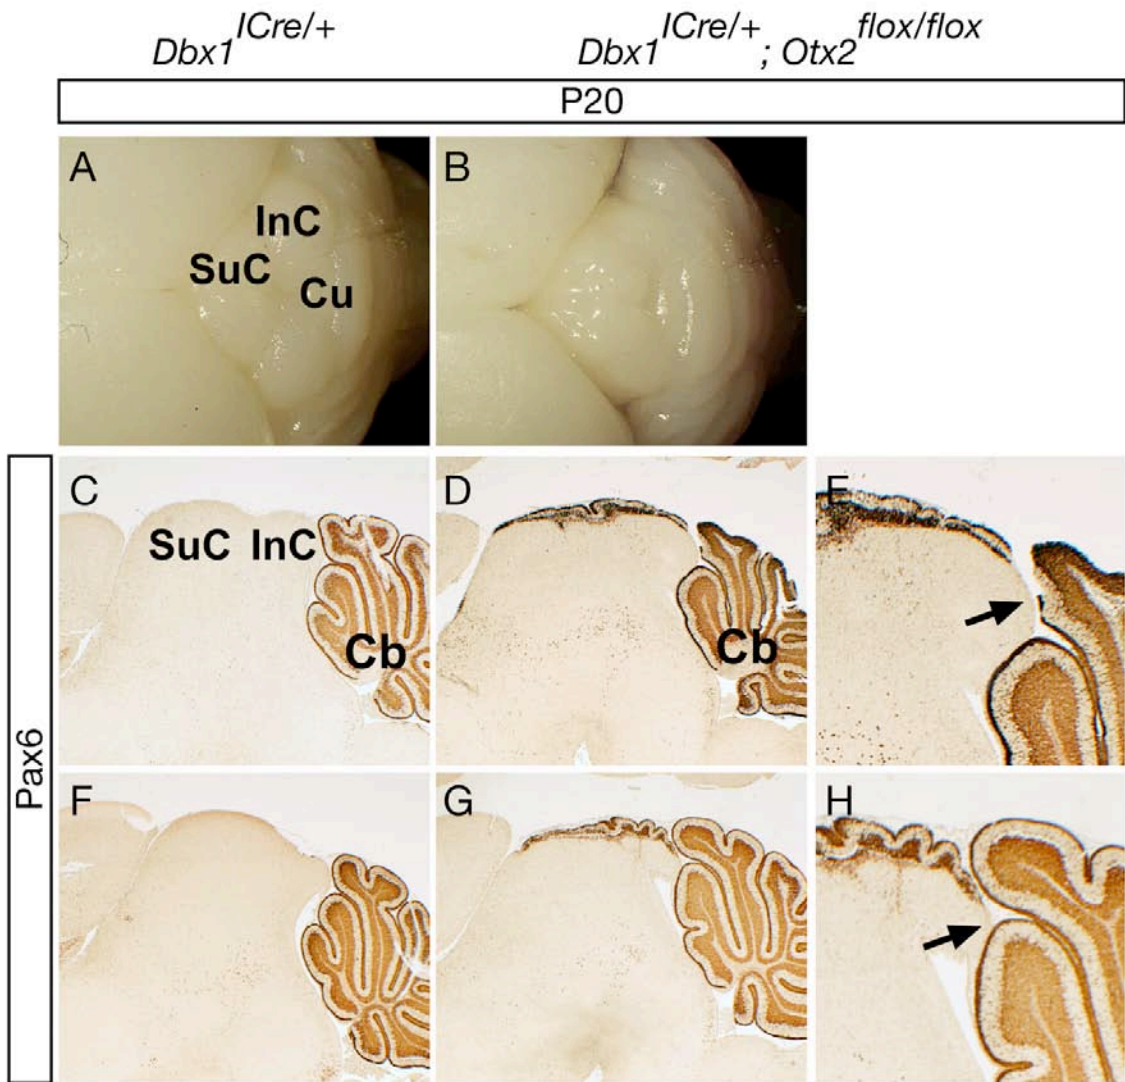

Fig. S4

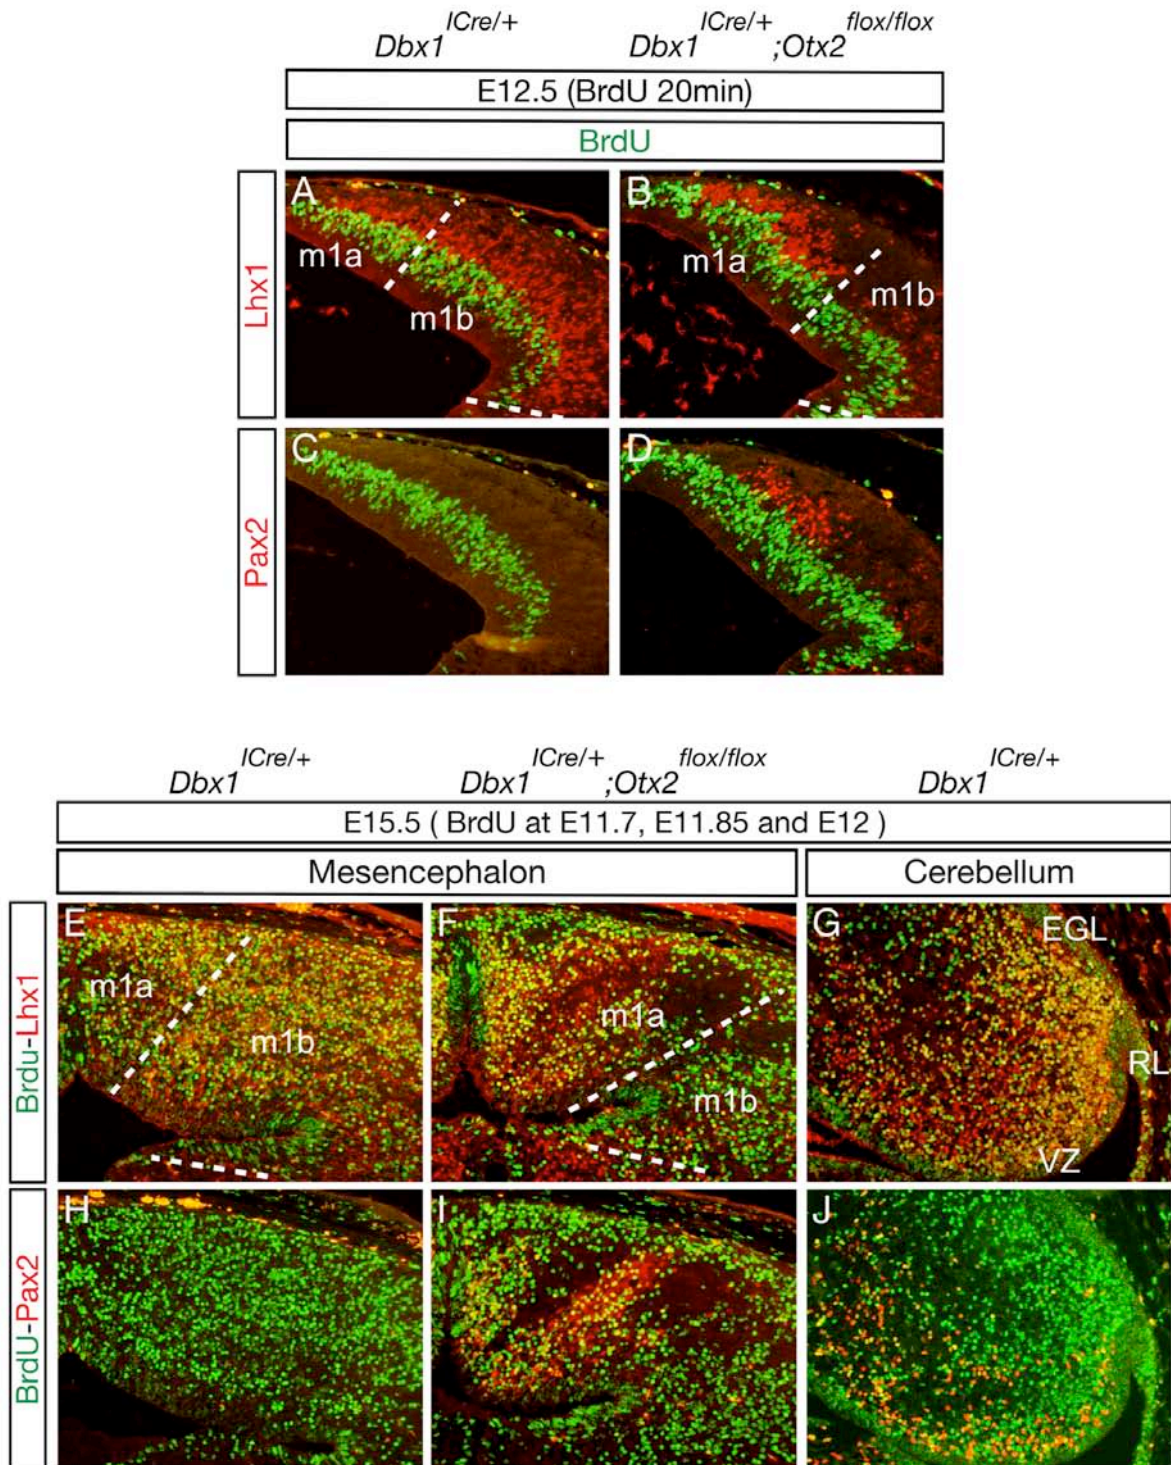

Fig. S5



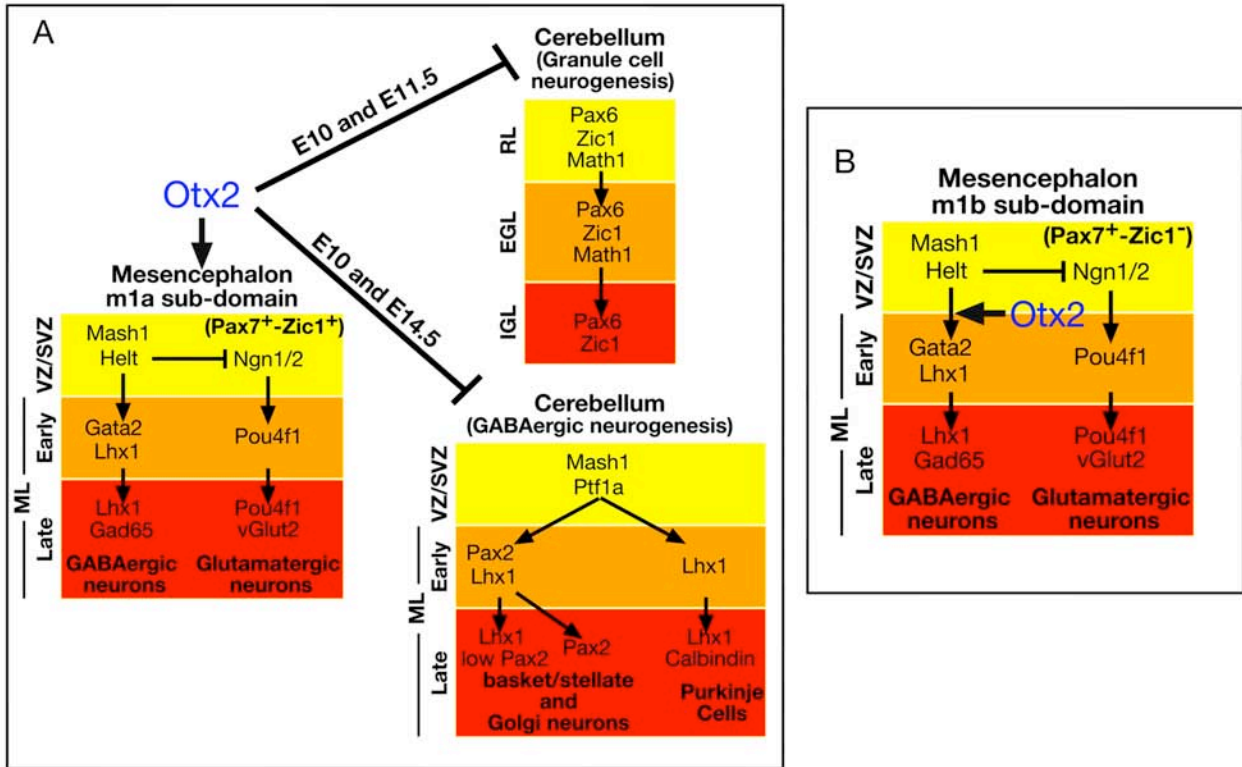

Fig. S6

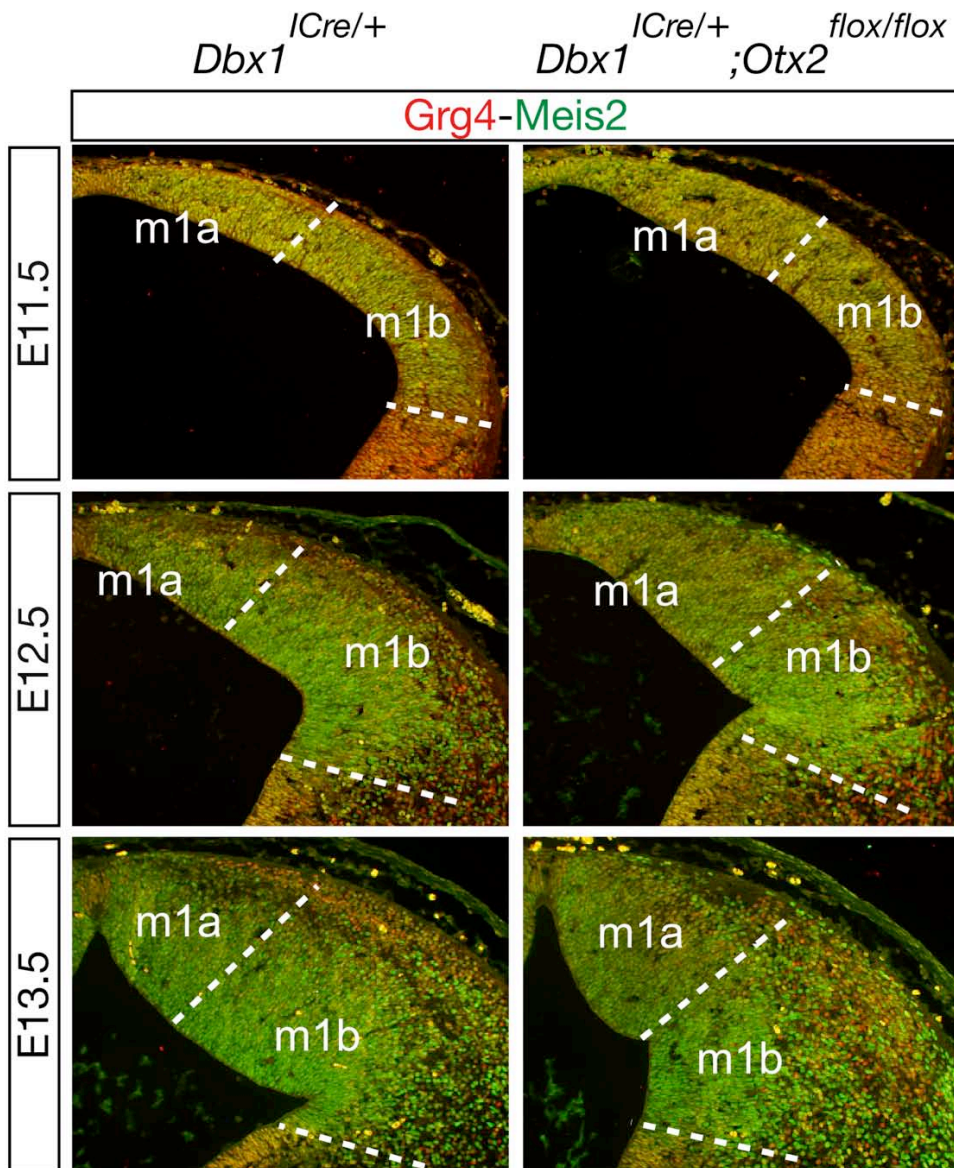

Fig. S7
